# Supplementary material
Source: PubMed Central journal article supplement (PMC1189347)

BM-HC  
in  
C57Bl/6

ES-HC  
in  
Rag2<sup>-/-</sup>γC<sup>-/-</sup>

Spleen

control

SF-HOX+Pre

control

SF-HOX+Pre

100x

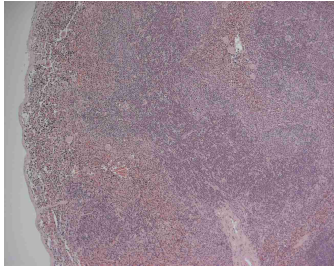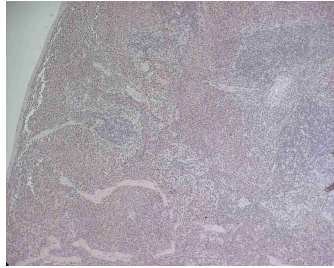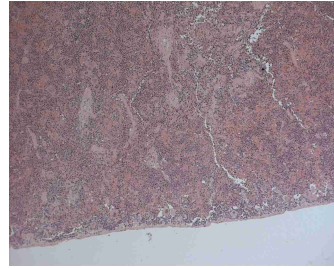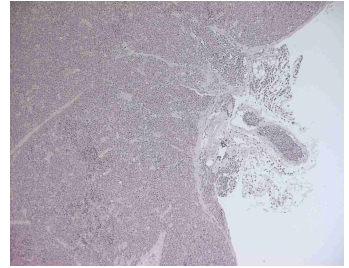

1000x

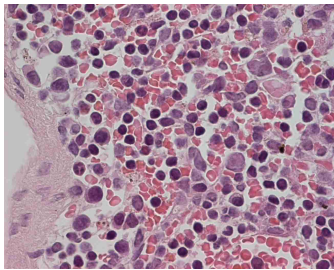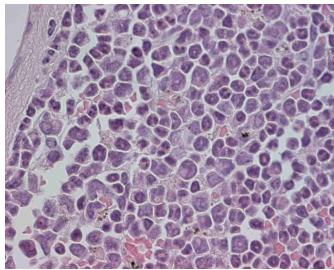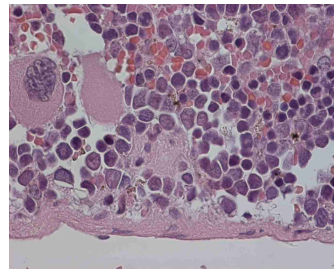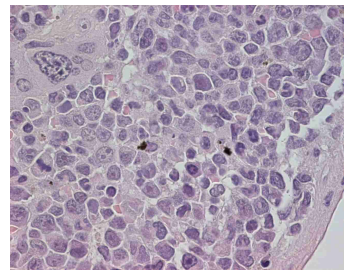

Bone Marrow

1000x

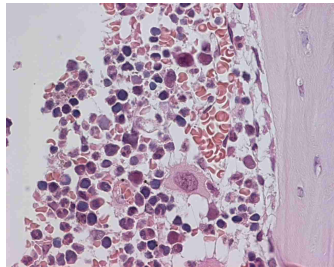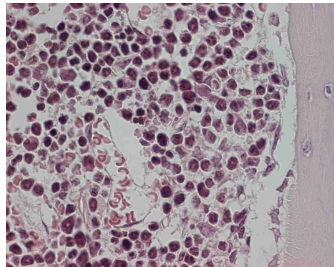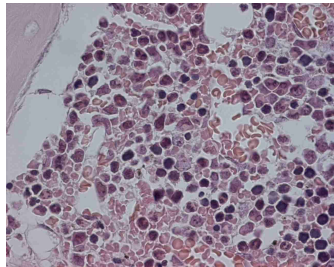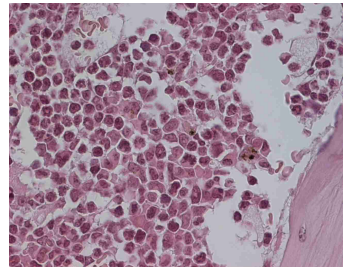

Supplement: pnas_0505624102_4.pdf [file pnas_0505624102_4.pdf]
