# Supplementary material
Source: PubMed Central journal article supplement (PMC1189347)

# BM-HC

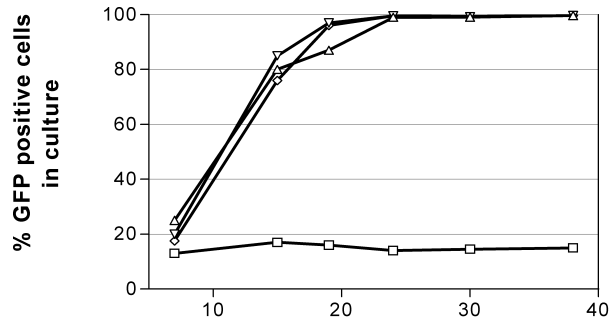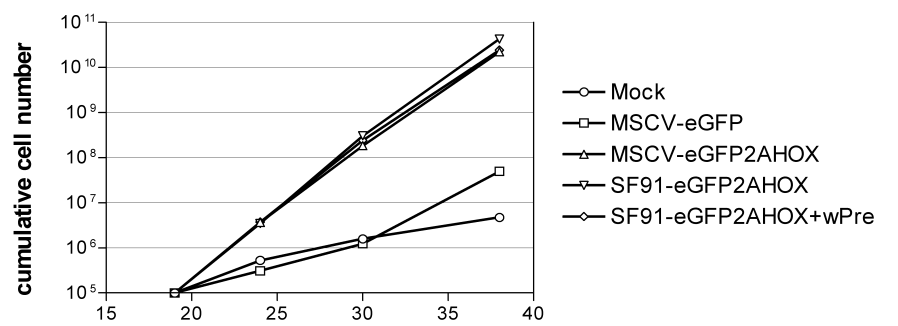

# ES-HC

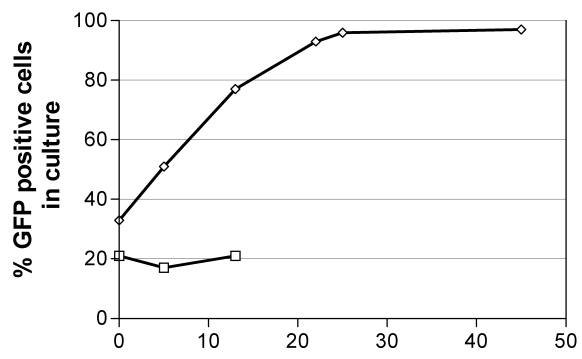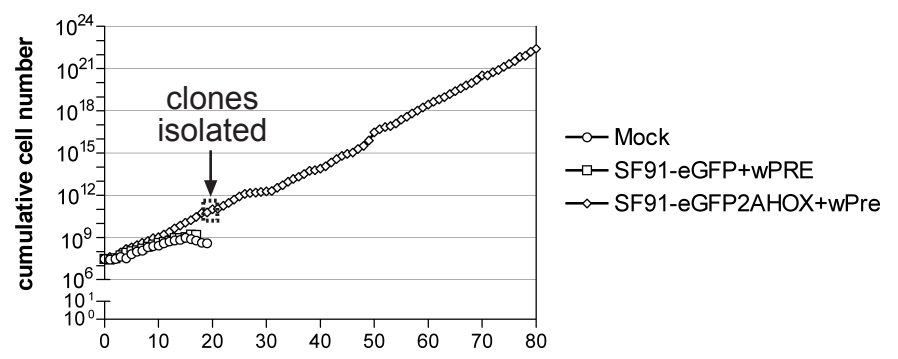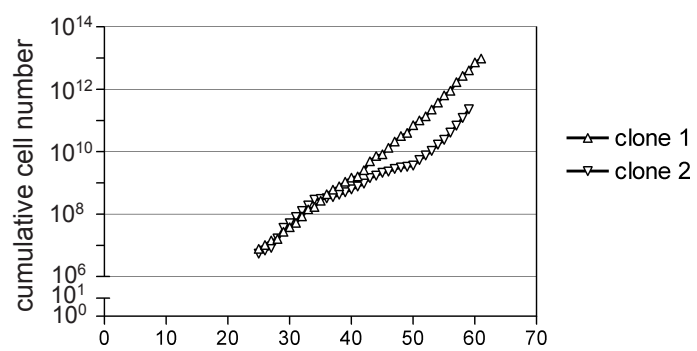

days in culture

Supplement: pnas_0505624102_1.pdf [file pnas_0505624102_1.pdf]

colonies/ 5000 cells

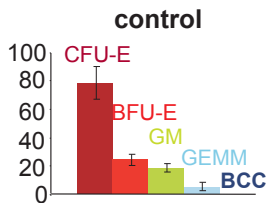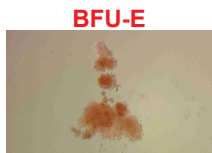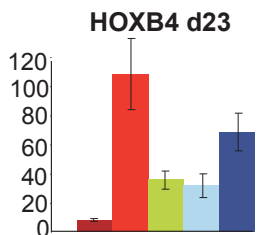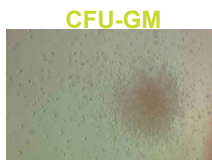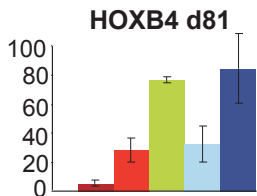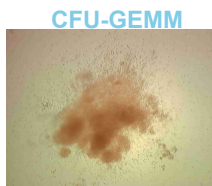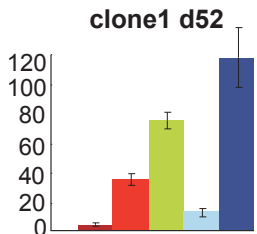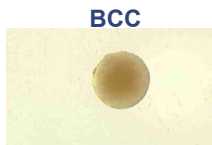

Supplement: pnas_0505624102_2.pdf [file pnas_0505624102_2.pdf]

**A**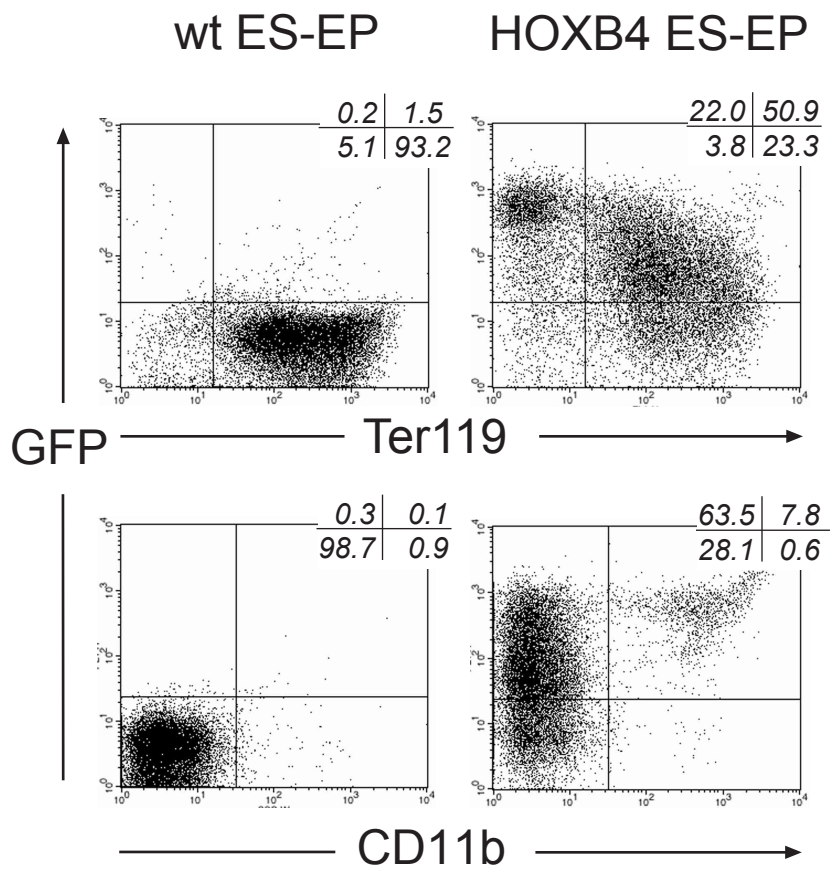**B**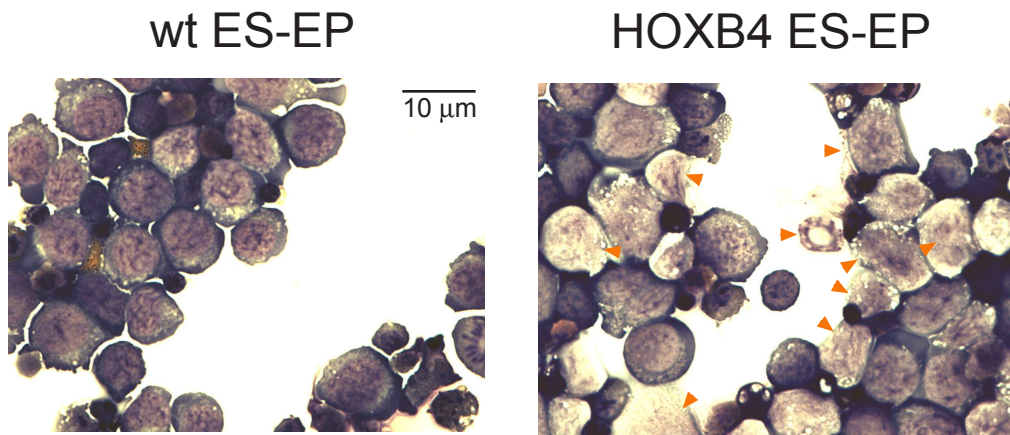

Supplement: pnas_0505624102_3.pdf [file pnas_0505624102_3.pdf]
